# Supplementary material
Source: publisher figshare collection journal article supplement (https://acs.figshare.com/ndownloader/files/4258987)
Supplement: Supplementary file 1 [file 4258987]

1 **Supporting Information**

2 **Factors Affecting Phase I Stereoselective Biotransformation of Chiral**  
3 **Polychlorinated Biphenyls (PCBs) by Rat Cytochrome P-450 2B1**  
4 **Isozyme**

5 ZHE LU<sup>1</sup> and CHARLES S. WONG<sup>1, 2\*</sup>

6 <sup>1</sup>*Department of Chemistry, University of Manitoba, Winnipeg, MB, R3T 2N2, Canada*

7 <sup>2</sup>*Richardson College for the Environment, Environmental Studies Program and*  
8 *Department of Chemistry, University of Winnipeg, Winnipeg, MB, R3B 2E9, Canada*

9 \*Corresponding author: +1-204-786-9335, +1-204-775-2114 fax,  
10 wong.charles.shiu@alum.mit.edu.

## **Experimental Section**

### **Chemicals and Regents**

Racemic chiral PCBs 45, 95 and 132, recovery standards PCB 30 and 204, and internal standard PCB 159 (all purity>99%) were purchased from Accustandard (West Haven, CT). PCB solutions were prepared in acetone. Individual PCB 132 atropisomer were isolated as previously published (1). Rat CYP2B1, insect cell control supersomes (P450 reductase and cytochrome b<sub>5</sub>) (stored at -70°C until use) and NADPH regeneration solutions (solution A: 31 mM NADP<sup>+</sup>, 66 mM glucose-6-phosphate and 66 mM MgCl<sub>2</sub> in water; solution B: 40 U/ml glucose-6-phosphate dehydrogenase in 5 mM sodium citrate) (stored at -20°C until use) were purchased from BD Biosciences (San Jose, CA). Mass-labeled hydroxylated PCBs (4-hydroxy-[<sup>13</sup>C<sub>12</sub>]-PCB 29; 4-hydroxy-[<sup>13</sup>C<sub>12</sub>]-PCB 61; 4-hydroxy-[<sup>13</sup>C<sub>12</sub>] PCB-120; 4-hydroxy-[<sup>13</sup>C<sub>12</sub>]-PCB 159; 4-hydroxy-[<sup>13</sup>C<sub>12</sub>]-PCB 172; 4-hydroxy-[<sup>13</sup>C<sub>12</sub>]-PCB 189) were purchased from Wellington Laboratories (Guelph, ON, Canada) as recovery standards for hydroxylated PCBs metabolite extraction (chemical purity > 98%, isotopic purity > 99%). Mass-labeled methoxy-PCBs (4-methoxy-[<sup>13</sup>C<sub>12</sub>]-PCB 29; 4-methoxy-[<sup>13</sup>C<sub>12</sub>]-PCB 61; 4-methoxy-[<sup>13</sup>C<sub>12</sub>]-PCB 120; 4-methoxy-[<sup>13</sup>C<sub>12</sub>]-PCB 159; 4-methoxy-[<sup>13</sup>C<sub>12</sub>]-PCB 172; 4-methoxy-[<sup>13</sup>C<sub>12</sub>]-PCB 189) were also purchased from Wellington Laboratories (Guelph, ON, Canada) (chemical purity > 98%, isotopic purity > 99%). Testosterone and its metabolite 16 $\alpha$ -testosterone were purchased from Steraloids (Newport RI, USA) as a positive control to correct biotransformation activities of CYP2B1 in all incubations.

### **Extraction and separation of PCBs and hydroxylated metabolites**

Briefly, PCBs 30, 204 and mass-labeled OH-PCBs were added as recovery standards to the incubation tubes after biotransformation reactions were terminated. The incubations were then acidified with HCl and washed by KCl and extracted with 6 mL of 1:1 methyl-*t*-butyl ether (MTBE)/hexane by separating funnel. The organic phase was collected and partitioned with 6 mL of 1 M KOH to separate the OH-PCBs from the neutral organic phase. Chiral PCBs in the neutral organic fraction was

purified using an acidified silica gel column (3 g, 22% H<sub>2</sub>SO<sub>4</sub>) and eluted with 20 mL of 15% (v/v) dichloromethane (DCM)/hexane. OH-PCBs in the aqueous fraction were then acidified by H<sub>2</sub>SO<sub>4</sub> and back-extracted into MTBE/hexane (1:1). The organic phase containing OH-PCBs was derivatized with diazomethane into their respective methoxy-PCBs (MeO-PCBs). The MeO-PCB fraction was purified using a 5 g column of the acidified silica gel and eluted with 50 mL of 1:1 DCM/hexane. Both PCBs and MeO-PCBs fractions were solvent exchanged to hexane and PCB 159 was used as an internal standard. Testosterone and 16 $\alpha$ -testosterone in the positive control samples were also acidified with HCl and washed by KCl and extracted with 10 mL ethyl acetate (2,3). All extraction procedures were repeated three times for each sample.

Recoveries of PCBs 30 and 204 were 85 $\pm$ 14% and 90 $\pm$ 12%, respectively. PCB concentrations were corrected based on the average recoveries of PCBs 30 and 204. Recoveries of mass-labeled derivatized OH-PCB standards were 39 $\pm$ 26% (MeO-PCB 29), 34 $\pm$ 19% (MeO-PCB 61), 115 $\pm$ 12% (MeOPCB 120), 105 $\pm$ 9% (MeOPCB 159), 107 $\pm$ 3% (MeOPCB 172) and 99 $\pm$ 5% (MeOPCB 189), similar to previous reports using the same extraction method (4). Recoveries of testosterone and 16 $\alpha$ -testosterone were 78 $\pm$ 10% and 80 $\pm$ 17%, respectively. PCB concentrations were determined using PeakFit v4.12 (Systat Software, San Jose, CA) to deconvolute chromatograms (1). All these recovery data were reported as average number  $\pm$  standard deviation.

## **Instrumental Analysis**

Chiral PCBs were quantified by using Hewlett Packard 5890 gas chromatograph equipped with a Hewlett Packard 5989 mass spectrometer (GC/MS) under electron impact ionization (70 eV) with selected ion monitoring ( $m/z$  256,258,260 for PCB 30;  $m/z$  290, 292, 294 for PCB 45;  $m/z$  324, 326, 328 for PCB 95;  $m/z$  358, 360, 362 for PCB 132 and PCB 159;  $m/z$  426, 428, 430 for PCB 204). A Chirasil-Dex column (30 m $\times$ 0.25 mm $\times$ 0.25  $\mu$ m d<sub>f</sub>, Varian, Palo Alto, CA) was used for quantification and atropisomer analysis of PCBs 95 and 132 (5). Cyclosil-B column (30m $\times$ 0.25mm $\times$ 0.25 $\mu$ m, J&W Scientific) was used for quantification and atropisomer

analysis of PCB 45 (5). one  $\mu\text{L}$  samples were injected in splitless mode at 250 °C with helium as carrier gas and at a constant flow rate of 36 cm/s. Initial oven temperature was held at 40 °C for 2 min, then ramped at 15 °C/min to 160 °C, ramped at 1 °C/min to 210°C, held for 5 min. The MeO-PCB fraction was separated by a DB-XLB column (30 m $\times$ 0.25 mm $\times$ 0.5  $\mu\text{m}$  d<sub>f</sub>, J&W Scientific) and initial oven temperature was held at 100°C initial temperature for 2 min, ramped at 20 °C/min to 240°C, held for 25 minutes, ramped at 10 °C/min to 275 °C followed by a 14 min hold (4).

Testosterone and 16 $\alpha$ -testosterone were quantified by high performance liquid chromatography using a Waters 1525 pump(Ontario, CA), and 2487 dual wavelength absorbance detector at 254 nm, and a Symmetry C<sub>18</sub> (150 $\times$ 4.6 mm i.d., 5 $\mu\text{m}$  particle size) column. The injection volume was 20  $\mu\text{L}$  and the column temperature was 25.0 °C. The mobile phase was isocratic with 0.02 M sodium dihydrogen phosphate, acetonitrile and methanol at 51:47:2, respectively, at 1.0 ml/min (6). All the biotransformation activity data were corrected by the testosterone control, which showed CYP2B1 activities of 2.3-4.1pmol product/min/pmol CYP2B1/mL throughout our experiments.

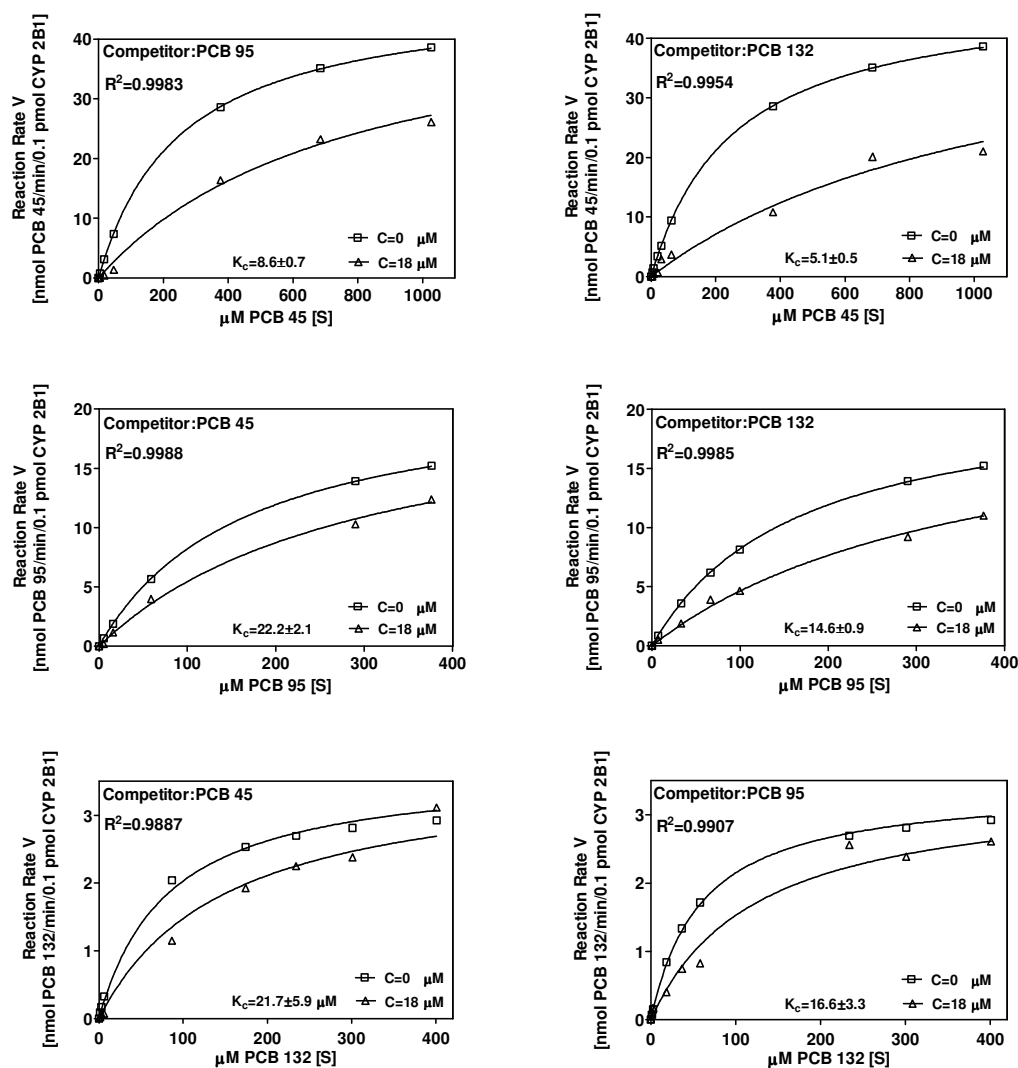

Figure S-1. Inhibition kinetics for PCB 45, PCB 95 and PCB 132.  $K_c$  is the equilibrium dissociation constant for the enzyme-competitor complex; C the abbreviation of competitor;  $R^2$  the global goodness of fit of nonlinear kinetic regression.

**Figure S2**

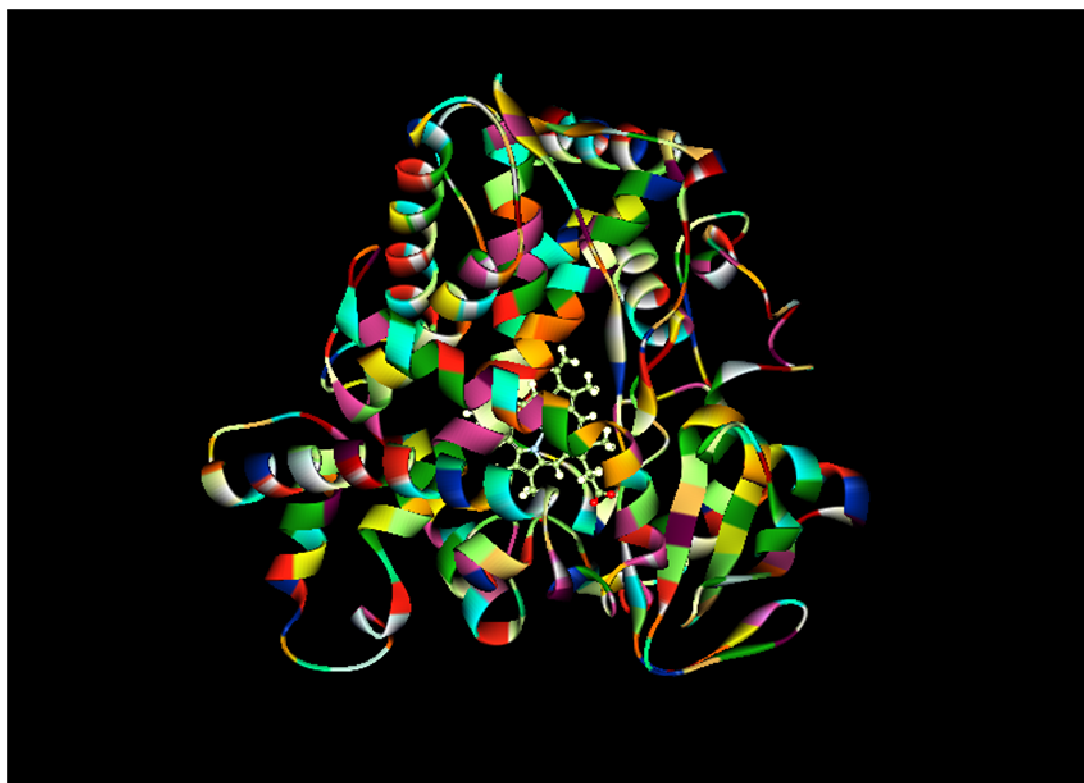

**Figure S-2. Three-dimensional structure of rat CYP2B1 from homology modeling**

Figure S3

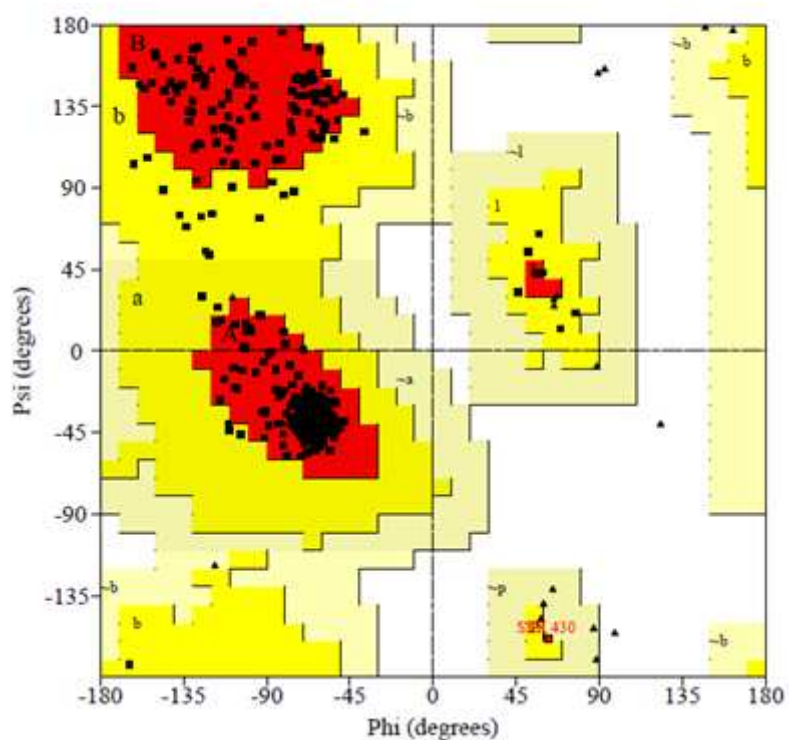

Figure S-3. Ramachandran plots of the rat CYP2B1 model. The different colored areas indicate “disallowed” (white), “generously allowed” (light yellow, ~a, ~b, ~l, ~p), “additional allowed” (yellow, a, b, l, p), and “most favored” (red, A, B, L) regions.

## Literature cited

- (1) Asher, B.J.; D'Agostino, L.A.; Way, J.D.; Wong, C.S.; Harynuk, J.J. Comparison of peak integration methods for the determination of enantiomeric fraction in environmental samples. *Chemosphere* **2009**, *75*, 1042-1048.
- (2) Baltes, M.; Dubois, J.; Hanocq, M. Ethyl acetate extraction procedure and isocratic high-performance liquid chromatographic assay for testosterone metabolites in cell microsomes. *J. Chromatogr.* **1998**, *706*, 201-207.
- (3) Baldwin, W.S. and LeBlanc, G.A. In vivo biotransformation of testosterone by phase I and II detoxication enzymes and their modulation by 20-hydroxyecdysone in *Daphnia magna*. *Aquat. Toxicol.* **1994**, *29*, 103-117.
- (4) Warner, N.A.; Martin, J.W.; Wong, C.S. Chiral polychlorinated biphenyls are biotransformed enantioselectively by mammalian cytochrome P-450 isozymes to form hydroxylated metabolites. *Environ. Sci. Technol.* **2009**, *43*, 114-121.
- (5) Wong, C.S.; Hoekstra, P.F.; Karlsson, H.; Backus, S.M.; Mabury, S.A.; Muir, D.C.G. Enantiomer fractions of chiral organochlorine pesticides and polychlorinated biphenyls in standard and certified reference materials. *Chemosphere* **2002**, *49*, 1339-1347.
- (6) Ng, B.H. and Yuen, K.H. Determination of plasma testosterone using a simple liquid chromatographic method. *J. Chromatogr. B* **2003**, *793*, 421-426.
